# Supplementary material for: Advanced lipid systems containing β-carotene: stability under UV-vis radiation and application on porcine skin in vitro
Source: Royal Society of Chemistry journal article supplement (doi:10.1039/c5cp02052b), 2015-01-01
Supplement: c5cp02052b1.pdf [file c5cp02052b1.pdf]

Supplementary material

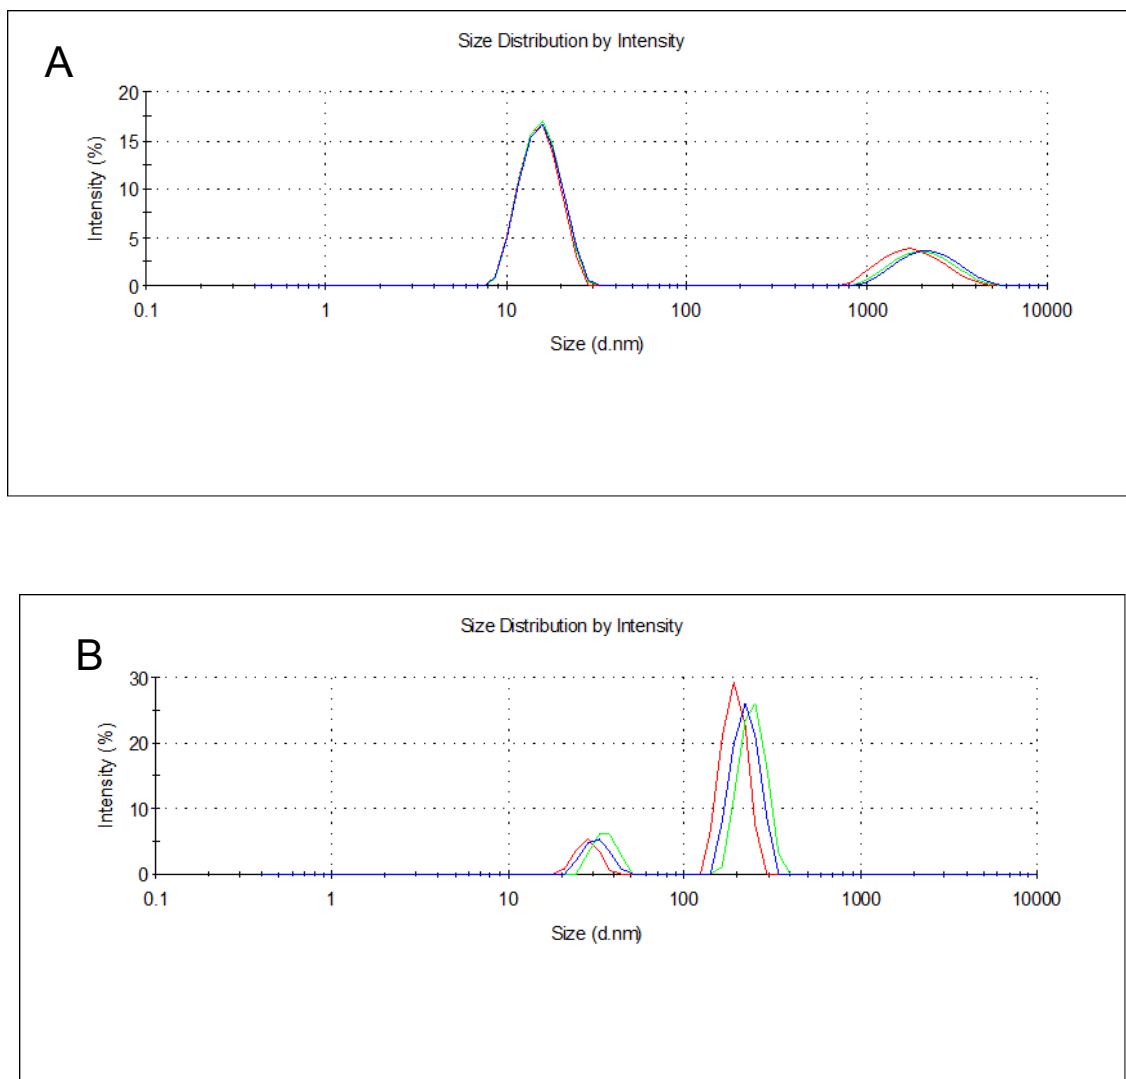

Size distribution curves obtained from DLS at 25°C for A) bicellar systems incorporating  $\beta$ -carotene and B) bicosomes incorporating  $\beta$ -carotene.
